# Supplementary material for: Incorporation of parental phenotypic data into multi‐omic models improves prediction of yield‐related traits in hybrid rice
Source: PubMed Central journal article supplement (PMC7868986; doi:10.1111/pbi.13458), 2020-09-02
Supplement: PBI-19-261-s001.pdf [file PBI-19-261-s001.pdf]

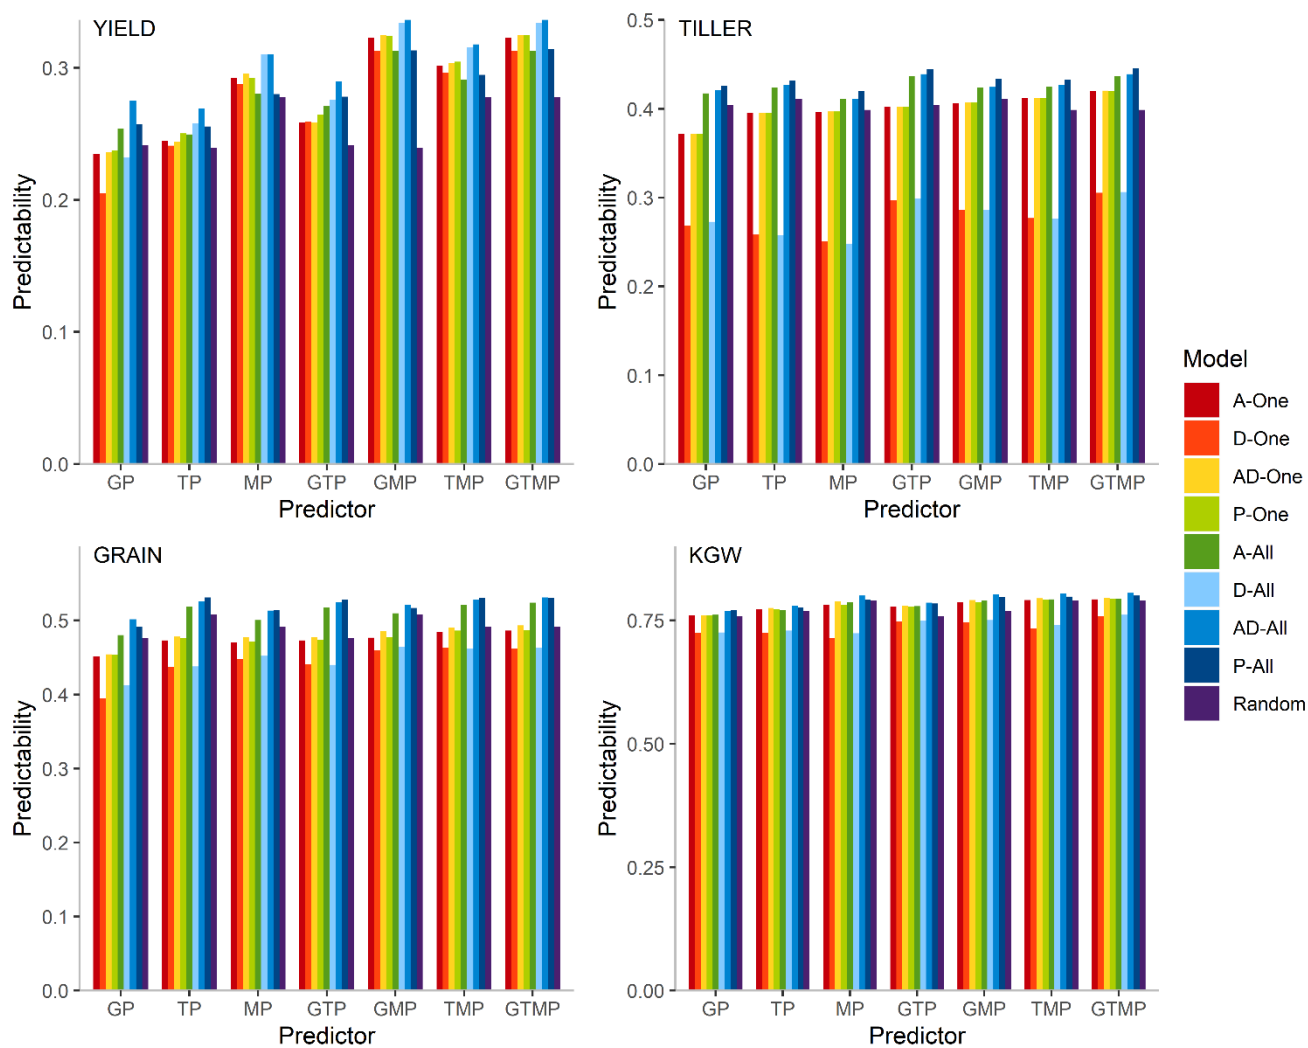

Figure S1. Predictabilities of four traits from seven predictor combinations comprising the predictor P with nine models. The seven predictor combinations are GP, TP, MP, GTP, GMP, TMP, and GTMP, where G, T, M, and P represent genome, transcriptome, metabolome, and phenome, respectively.

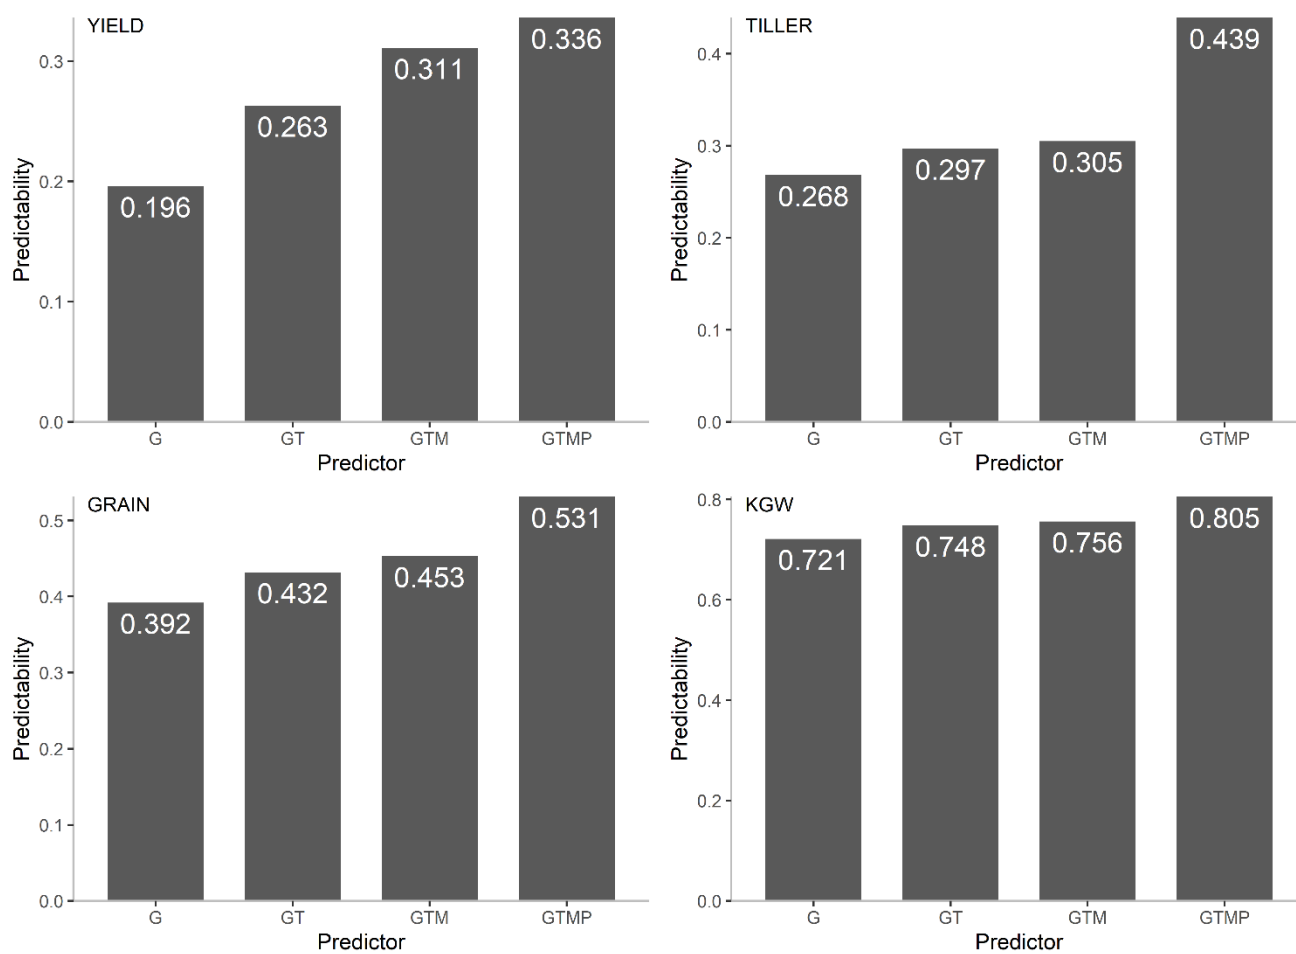

Figure S2. Predictabilities of four predictors (G, GT, GTM, and GTMP) for four traits.

Table S1. Analysis of variance of predictabilities from a 15×2×4 factorial design with 15 predictors, two prediction models, and four traits

| Source of variation | DF | Sum of Squares | Mean Squares | F-test    | <i>P</i> -value |
|---------------------|----|----------------|--------------|-----------|-----------------|
| Predictor           | 14 | 0.148          | 0.0106       | 240.312   | <2e-16***       |
| Model               | 1  | 0.006          | 0.0057       | 130.597   | 1.80e-14***     |
| Trait               | 3  | 4.284          | 1.4279       | 32497.439 | <2e-16***       |
| Predictor: Model    | 14 | 0.002          | 0.0001       | 3.015     | 0.00285**       |
| Predictor: Trait    | 42 | 0.111          | 0.0026       | 59.930    | <2e-16***       |
| Model: Trait        | 3  | 0.004          | 0.0015       | 33.312    | 3.49e-11***     |
| Residuals           | 42 | 0.002          | 0.0000       |           |                 |

The 15 predictors are G, T, M, P, GT, GM, GP, TM, TP, MP, GTM, GTP, GMP, TMP, and GTMP. The two prediction models are additive model and additive-dominance model.

Table S2. Analysis of variance of predictabilities from a 9×7 factorial design with nine models and seven predictors for four traits

| Trait  | Source of variation | DF | Sum of Squares | Mean Squares | F-test | <i>P</i> -value |
|--------|---------------------|----|----------------|--------------|--------|-----------------|
| YIELD  | Predictor           | 6  | 0.0504         | 0.0084       | 57.99  | <2e-16 ***      |
|        | Model               | 8  | 0.0098         | 0.0012       | 8.496  | 4.1e-07 ***     |
|        | Residuals           | 48 | 0.0070         | 0.0001       |        |                 |
| TILLER | Predictor           | 6  | 0.0068         | 0.0011       | 12.34  | 2.35e-08 ***    |
|        | Model               | 8  | 0.2083         | 0.0260       | 284.52 | <2e-16 ***      |
|        | Residuals           | 48 | 0.0044         | 0.0001       |        |                 |
| GRAIN  | Predictor           | 6  | 0.0095         | 0.0016       | 25.95  | 1.67e-13 ***    |
|        | Model               | 8  | 0.0464         | 0.0058       | 94.9   | <2e-16 ***      |
|        | Residuals           | 48 | 0.0029         | 0.0001       |        |                 |
| KGW    | Predictor           | 6  | 0.0072         | 0.0012       | 23.46  | 9.89e-13 ***    |
|        | Model               | 8  | 0.0240         | 0.0030       | 58.83  | <2e-16 ***      |
|        | Residuals           | 48 | 0.0024         | 0.0001       |        |                 |

The seven predictor combinations are GP, TP, MP, GTP, GMP, TMP, and GTMP. The nine models are Random, A-One, D-One, AD-One, P-One, A-All, D-All, AD-All, P-All.

Table S3. Predictabilities of the HAT and CV methods under 10-fold and  $n$ -fold for four traits from 15 predictor combinations

| Predictor | YIELD         |                |                 |                  | TILLER        |                |                 |                  | GRAIN         |                |                 |                  | KGW           |                |                 |                  |
|-----------|---------------|----------------|-----------------|------------------|---------------|----------------|-----------------|------------------|---------------|----------------|-----------------|------------------|---------------|----------------|-----------------|------------------|
|           | 10-fold<br>CV | 10-fold<br>HAT | $n$ -fold<br>CV | $n$ -fold<br>HAT | 10-fold<br>CV | 10-fold<br>HAT | $n$ -fold<br>CV | $n$ -fold<br>HAT | 10-fold<br>CV | 10-fold<br>HAT | $n$ -fold<br>CV | $n$ -fold<br>HAT | 10-fold<br>CV | 10-fold<br>HAT | $n$ -fold<br>CV | $n$ -fold<br>HAT |
| G         | 0.140         | 0.149          | 0.154           | 0.160            | 0.249         | 0.255          | 0.264           | 0.268            | 0.366         | 0.374          | 0.385           | 0.390            | 0.693         | 0.695          | 0.710           | 0.712            |
| T         | 0.209         | 0.222          | 0.224           | 0.235            | 0.239         | 0.251          | 0.255           | 0.266            | 0.403         | 0.411          | 0.417           | 0.426            | 0.697         | 0.703          | 0.717           | 0.722            |
| M         | 0.236         | 0.245          | 0.249           | 0.257            | 0.232         | 0.244          | 0.247           | 0.257            | 0.409         | 0.416          | 0.424           | 0.431            | 0.674         | 0.679          | 0.699           | 0.705            |
| P         | 0.096         | 0.098          | 0.097           | 0.099            | 0.380         | 0.380          | 0.381           | 0.381            | 0.409         | 0.410          | 0.410           | 0.410            | 0.728         | 0.728          | 0.729           | 0.729            |
| GT        | 0.201         | 0.219          | 0.218           | 0.232            | 0.277         | 0.289          | 0.291           | 0.301            | 0.403         | 0.413          | 0.417           | 0.427            | 0.714         | 0.720          | 0.733           | 0.737            |
| GM        | 0.236         | 0.246          | 0.248           | 0.258            | 0.266         | 0.277          | 0.279           | 0.288            | 0.420         | 0.428          | 0.433           | 0.439            | 0.707         | 0.711          | 0.724           | 0.728            |
| GP        | 0.181         | 0.187          | 0.189           | 0.194            | 0.385         | 0.391          | 0.388           | 0.393            | 0.451         | 0.456          | 0.457           | 0.461            | 0.739         | 0.743          | 0.743           | 0.746            |
| TM        | 0.225         | 0.243          | 0.237           | 0.255            | 0.253         | 0.269          | 0.266           | 0.281            | 0.400         | 0.416          | 0.415           | 0.431            | 0.698         | 0.707          | 0.719           | 0.727            |
| TP        | 0.204         | 0.222          | 0.220           | 0.233            | 0.402         | 0.410          | 0.405           | 0.412            | 0.489         | 0.497          | 0.497           | 0.504            | 0.753         | 0.762          | 0.764           | 0.769            |
| MP        | 0.232         | 0.243          | 0.243           | 0.253            | 0.387         | 0.395          | 0.390           | 0.398            | 0.484         | 0.489          | 0.489           | 0.495            | 0.758         | 0.763          | 0.764           | 0.768            |
| GTM       | 0.227         | 0.245          | 0.238           | 0.256            | 0.279         | 0.296          | 0.292           | 0.307            | 0.411         | 0.426          | 0.425           | 0.438            | 0.717         | 0.723          | 0.735           | 0.740            |
| GTP       | 0.197         | 0.216          | 0.210           | 0.226            | 0.397         | 0.408          | 0.398           | 0.411            | 0.483         | 0.494          | 0.491           | 0.500            | 0.739         | 0.760          | 0.758           | 0.766            |
| GMP       | 0.230         | 0.244          | 0.241           | 0.254            | 0.382         | 0.395          | 0.384           | 0.397            | 0.480         | 0.490          | 0.486           | 0.495            | 0.757         | 0.763          | 0.763           | 0.768            |
| TMP       | 0.221         | 0.242          | 0.232           | 0.252            | 0.396         | 0.411          | 0.399           | 0.413            | 0.488         | 0.499          | 0.494           | 0.505            | 0.756         | 0.764          | 0.763           | 0.769            |
| GTMP      | 0.220         | 0.243          | 0.229           | 0.253            | 0.392         | 0.410          | 0.392           | 0.412            | 0.484         | 0.498          | 0.490           | 0.504            | 0.756         | 0.765          | 0.763           | 0.770            |
| $r$       | 0.993         |                | 0.994           |                  | 0.998         |                | 0.997           |                  | 0.996         |                | 0.995           |                  | 0.988         |                | 0.996           |                  |

$r$  indicates the Pearson correlation coefficients between 10-fold CV and 10-fold HAT and between  $n$ -fold CV and  $n$ -fold HAT.

Predictabilities for 10-fold HAT and 10-fold CV were averaged over 50 replicates.
